# Supplementary material for: Stroke Risk Status, Anticoagulation Treatment, and Quality-of-Life in Chinese Patients with Atrial Fibrillation: China Registry of Atrial Fibrillation (CRAF)
Source: Hindawi journal article supplement (doi:10.1155/2019/7372129), 2019-03-21
Supplement: f1 [file 7372129.f1.pdf]

Supplements

S1 The CHADS2, CHA2DS2-VASc, and HAS-BLED scores in patients with VAF

|                                       | N   | %    |
|---------------------------------------|-----|------|
| CHADS2 score                          | 599 |      |
| 0                                     | 133 | 22.2 |
| 1                                     | 225 | 37.6 |
| 2                                     | 114 | 19.0 |
| 3                                     | 80  | 13.4 |
| 4                                     | 29  | 4.8  |
| 5                                     | 16  | 2.7  |
| 6                                     | 1   | 0.2  |
| 7                                     | 1   | 0.2  |
| CHA <sub>2</sub> DS <sub>2</sub> -VSC |     |      |
| 0                                     | 36  | 6.0  |
| 1                                     | 127 | 21.2 |
| 2                                     | 166 | 27.7 |
| 3                                     | 106 | 17.7 |
| 4                                     | 80  | 13.4 |
| 5                                     | 52  | 8.7  |
| 6                                     | 21  | 3.5  |
| 7                                     | 10  | 1.7  |
| 8                                     | 1   | 0.2  |

---

HAS\_BLED

|   |     |      |
|---|-----|------|
| 0 | 218 | 36.4 |
| 1 | 189 | 31.6 |
| 2 | 131 | 21.9 |
| 3 | 49  | 8.2  |
| 4 | 11  | 1.8  |
| 5 | 1   | 0.2  |

---

S2 The univariable analysis of the factors associated with under-anticoagulation in patients with NVAF

| Characteristics                         | OAC<br>(n =948 )   | Non OAC<br>(n = 2614) | p-Value |
|-----------------------------------------|--------------------|-----------------------|---------|
| Age (years), mean $\pm$ SD              | 67.14 $\pm$ 11.29  | 70.12 $\pm$ 11.66     | <0.001  |
| Female, n (%)                           | 409 (43.1)         | 1132 (43.3)           | 0.9313  |
| Duration of AF (years), mean $\pm$ SD   | 5.04 $\pm$ 5.96    | 5.15 $\pm$ 6.42       | 0.5908  |
| Region, n, (%)                          |                    |                       | <0.001  |
| Northeast                               | 27 (2.8)           | 98 (3.7)              |         |
| East                                    | 543 (57.3)         | 1736 (66.4)           |         |
| West                                    | 143 (15.1)         | 337 (12.9)            |         |
| Middle                                  | 235 (24.8)         | 443 (16.9)            |         |
| Hospital level, n (%)                   |                    |                       | <0.001  |
| Secondary                               | 84 (8.9)           | 560 (21.4)            |         |
| Tertiary                                | 864 (91.2)         | 2054 (78.5)           |         |
| Current smoker, n (%)                   | 90 (9.6)           | 293 (11.3)            | 0.3014  |
| BMI (kg/m <sup>2</sup> ), mean $\pm$ SD | 24.49 $\pm$ 3.35   | 24.17 $\pm$ 3.53      | 0.0114  |
| SBP (mmHg), mean $\pm$ SD               | 127.84 $\pm$ 16.86 | 131.77 $\pm$ 18.30    | <0.001  |
| DBP (mmHg), mean $\pm$ SD               | 78.20 $\pm$ 10.98  | 78.84 $\pm$ 11.81     | 0.1274  |
| Type of AF, n (%)                       |                    |                       | <0.001  |
| New-onset                               | 89 (9.4)           | 381 (14.6)            |         |
| Paroxysmal                              | 293 (31.1)         | 964 (37.0)            |         |

|                               |            |             |        |
|-------------------------------|------------|-------------|--------|
| Persistent                    | 332 (35.2) | 740 (28.4)  |        |
| Permanent                     | 229 (24.3) | 523 (20.1)  |        |
| Cardiovascular disease, n (%) |            |             |        |
| Coronary artery disease       | 225 (23.8) | 1096 (42.3) | <0.001 |
| Hypertension                  | 565(59.6)  | 1634 (62.6) | 0.1063 |
| Diabetes mellitus             | 165 (17.4) | 459 (17.6)  | 0.9175 |
| Heart failure                 | 281 (29.7) | 954 (36.6)  | <0.001 |
| NYHA classification           |            |             | <0.001 |
| II                            | 98( 10.3%) | 225( 8.6%)  |        |
| III                           | 127(13.4%) | 450(17.3%)  |        |
| IV                            | 41( 4.3%)  | 246( 9.4%)  |        |
| Peripheral artery disease     | 46 (4.9)   | 115 (4.4)   | 0.5642 |
| Renal dysfunction             | 27 (2.8)   | 140 (5.4)   | 0.0010 |
| Hepatic disease               | 31 (3.3)   | 108 (4.1)   | 0.2306 |
| Dyslipidemia                  | 234 (24.7) | 538 (20.6)  | 0.0088 |
| Thromboembolic events, n (%)  |            |             |        |
| Ischemic stroke               | 138 (14.6) | 310 (11.9)  | 0.0342 |
| TIA                           | 31 (3.3)   | 73 (2.8)    | 0.4598 |
| Non-CNS embolism              | 16 (1.7)   | 13 (0.5)    | 0.0011 |
| Bleeding events               |            |             |        |
| GI bleeding                   | 20(2.1)    | 54(2.1)     | 0.9354 |
| ICH                           | 19(2.0)    | 37(1.4)     | 0.2235 |

|                                 |            |             |        |
|---------------------------------|------------|-------------|--------|
| Antiarrhythmic treatment, n (%) |            |             | <0.001 |
| Rhythm control                  | 265 (28.0) | 525 (20.1)  |        |
| Rate control                    | 503 (53.1) | 1396 (53.5) |        |
| Both                            | 113 (11.9) | 257 (9.8)   |        |

---

S3 The univariable analysis of the factors associated with under-anticoagulation in patients with VAF

| Characteristics                         | OAC<br>(n =345 )   | Non OAC<br>(n = 254) | P      |
|-----------------------------------------|--------------------|----------------------|--------|
| Age (years), mean $\pm$ SD              | 60.03 $\pm$ 11.6   | 64.59 $\pm$ 11.48    | <0.001 |
| Female, n (%)                           | 236 (68.4)         | 173 (68.1)           | 0.939  |
| Duration of AF (years), mean $\pm$ SD   | 8.75 $\pm$ 9.02    | 8.15 $\pm$ 9.12      | 0.4429 |
| Region, n, (%)                          |                    |                      | 0.0130 |
| Northeast                               | 5 (1.4)            | 8 (2.2)              |        |
| East                                    | 213 (61.7)         | 172 (67.7)           |        |
| West                                    | 67 (19.4)          | 36 (14.2)            |        |
| Middle                                  | 60 (17.4)          | 38 (15.0)            |        |
| Hospital level, n (%)                   |                    |                      | 0.009  |
| Secondary                               | 44 (12.8)          | 54 (21.3)            |        |
| Tertiary                                | 301 (87.2)         | 200 (78.7)           |        |
| Current smoker, n (%)                   | 16 (4.7)           | 12 (4.7)             | 0.994  |
| BMI (kg/m <sup>2</sup> ), mean $\pm$ SD | 22.55 $\pm$ 3.20   | 22.97 $\pm$ 3.65     | 0.052  |
| SBP (mmHg), mean $\pm$ SD               | 122.63 $\pm$ 16.52 | 124.03 $\pm$ 17.84   | 0.324  |
| DBP (mmHg), mean $\pm$ SD               | 74.16 $\pm$ 10.51  | 76.56 $\pm$ 11.79    | 0.011  |
| Type of AF, n (%)                       |                    |                      | 0.038  |
| New-onset                               | 19 (5.6)           | 22 (8.7)             |        |
| Paroxysmal                              | 42 (12.3)          | 48 (19.0)            |        |

|                               |            |            |        |
|-------------------------------|------------|------------|--------|
| Persistent                    | 131 (38.3) | 90 (36.6)  |        |
| Permanent                     | 150 (43.9) | 93 (36.8)  |        |
| Cardiovascular disease, n (%) |            |            |        |
| Coronary artery disease       | 36 (10.4)  | 38 (15.1)  | 0.091  |
| Hypertension                  | 94 (27.2)  | 84 (32.3)  | 0.182  |
| Diabetes mellitus             | 48 (13.9)  | 33 (13.0)  | 0.744  |
| Heart failure                 | 211 (61.5) | 142 (56.1) | 0.186  |
| NYHA classification           |            |            | <0.001 |
| II                            | 58(16.9%)  | 16(6.3%)   |        |
| III                           | 103 30.0%) | 65(25.7%)  |        |
| IV                            | 43(12.5%)  | 58(22.9%)  |        |
| Peripheral artery disease     | 18 (5.2)   | 5 (2.0)    | 0.441  |
| Renal dysfunction             | 11 (3.2)   | 8 (3.1)    | 0.979  |
| Hepatic disease               | 16 (4.6)   | 13 (5.1)   | 0.787  |
| Dyslipidemia                  | 40 (11.6)  | 39 (15.4)  | 0.181  |
| Thromboembolic events, n (%)  |            |            |        |
| Ischemic stroke               | 47 (13.6)  | 23 (9.1)   | 0.082  |
| TIA                           | 13 (3.8)   | 6 (2.4)    | 0.325  |
| Non-CNS embolism              | 10 (2.9)   | 3 (1.2)    | 0.139  |
| Bleeding events               |            |            |        |
| GI bleeding                   | 5(1.4)     | 8(3.1)     | 0.161  |
| ICH                           | 9(2.6)     | 2(0.8)     | 0.129  |

|                                 |            |            |       |
|---------------------------------|------------|------------|-------|
| others                          |            |            |       |
| Antiarrhythmic treatment, n (%) |            |            | 0.007 |
| Rhythm control                  | 29 (8.4)   | 35 (13.8)  |       |
| Rate control                    | 265 (77.0) | 166 (65.4) |       |
| Both                            | 23 (6.7)   | 17 (6.7)   |       |
